# Supplementary material for: Olaparib promotes FABP4 expression and reduces antitumor effect in ovarian cancer cells with a BRCA1 mutation
Source: PubMed Central journal article supplement — Oncol Lett. 2024 Nov 20;29(2):67. doi: 10.3892/ol.2024.14813 (PMC11605280; doi:10.3892/ol.2024.14813), 2024-11-20
Supplement: Supplementary_Data.pdf [file Supplementary_Data.pdf]

**Table SI.** Sequences of PCR primers.

| <b>Primer</b> | <b>Sequence (5'-3')</b> |                         |
|---------------|-------------------------|-------------------------|
|               | <b>Forward</b>          | <b>Reverse</b>          |
| GAPDH         | GGAGCGAGATCCCTCCAAAAT   | GGCTGTTGTCATACTTCTCATGG |
| BRCA1         | GAAACCGTGCCAAAAGACTTC   | CCAAGGTTAGAGAGTTGGACAC  |
| BRCA2         | ACAAGCAACCCAAGTGCAAT    | TGAAGCTACTCCAAAAGTGTG   |
| PPAR $\gamma$ | GGGATCAGCTCCGTGGATCT    | TGCACTTTGGTACTCTTGAAGTT |
| FABP4         | ACTGGGCCAGGAATTTGACG    | CTCGTGGGAAGTGACGCCTT    |

BRCA, breast cancer susceptibility gene; PPAR $\gamma$ , peroxisome proliferator activated receptor  $\gamma$ ; FABP4, fatty acid binding protein 4.

**Table SII.** Sequences of primers in the chromatin immunoprecipitation assay.

| <b>Primer</b> | <b>Sequence (5'-3')</b> |                       |
|---------------|-------------------------|-----------------------|
|               | <b>Forward</b>          | <b>Reverse</b>        |
| PPAR $\gamma$ | CCTGTTTCCTTGCCTCCCAG    | GTCAGAAGTGCGTAGGGTG   |
| FABP4         | GCTTGTACCACACACCATT     | AACCTCACTCTTTCATCTCCT |

PPAR $\gamma$ , peroxisome proliferator activated receptor  $\gamma$ ; FABP4, fatty acid binding protein 4.
